# Supplementary material for: Prognostic role of tumor-infiltrating CD57-positive lymphocytes in solid tumors: a meta-analysis
Source: PubMed Central journal article supplement (PMC5814286; doi:10.18632/oncotarget.23621), 2017-12-22
Supplement: oncotarget-09-8111-s001.pdf [file oncotarget-09-8111-s001.pdf]

# Prognostic role of tumor-infiltrating CD57-positive lymphocytes in solid tumors: a meta-analysis

## SUPPLEMENTARY MATERIALS

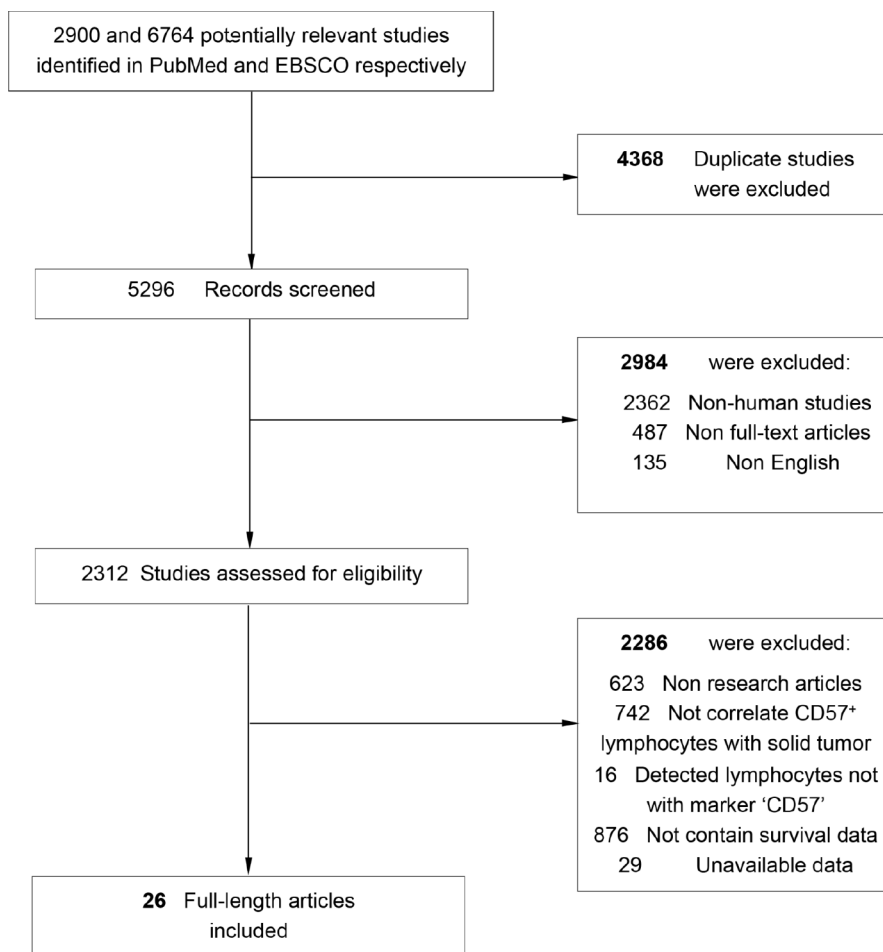

Supplementary Figure 1: Flow chart diagram of study selection.

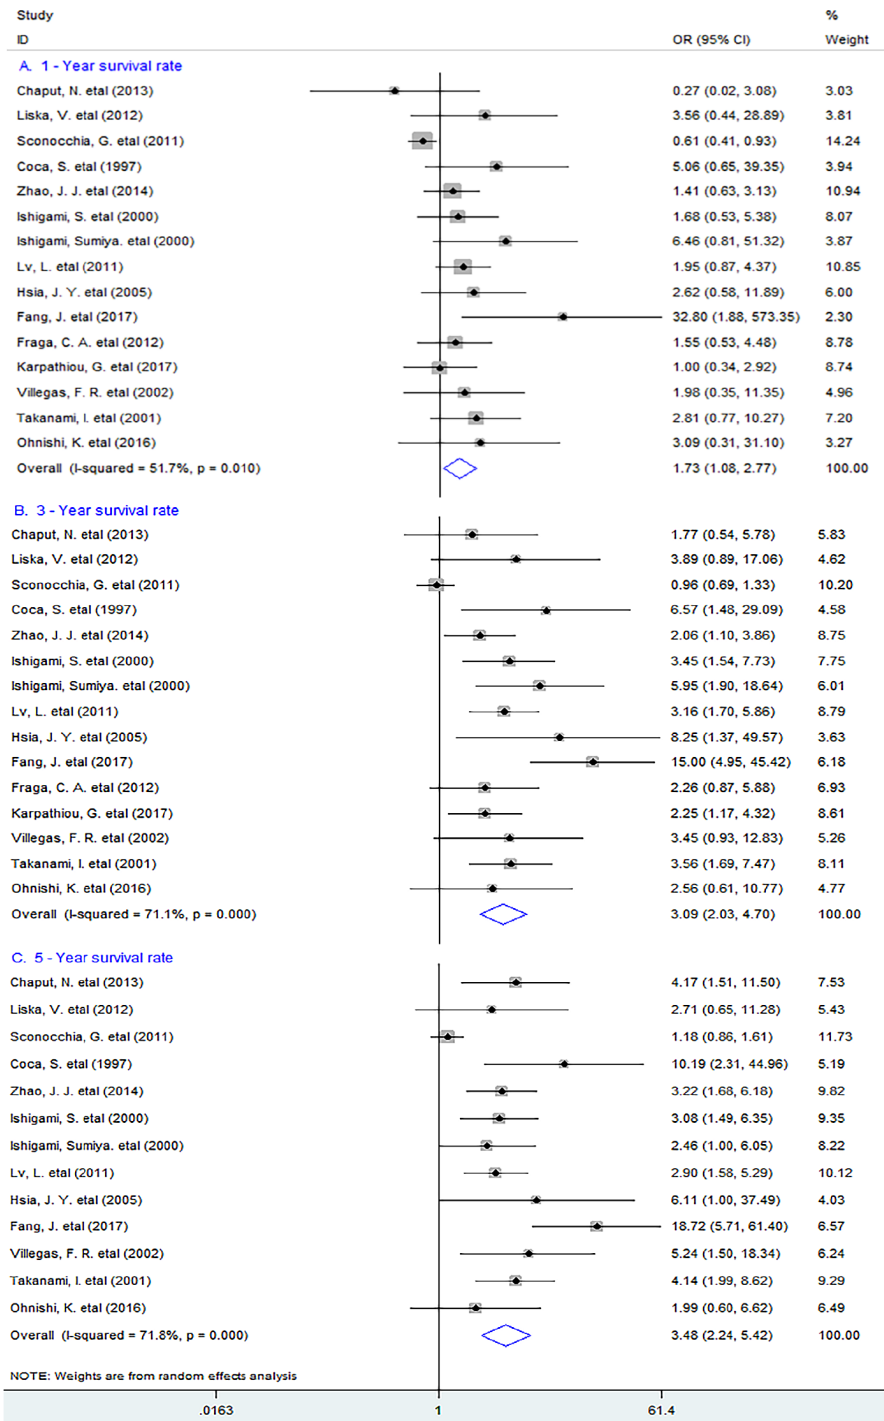

**Supplementary Figure 2: Forest plots describing ORs of the association between CD57<sup>+</sup> lymphocyte infiltration and OS at 1-year, 3-year and 5-year of patients with solid tumor.**

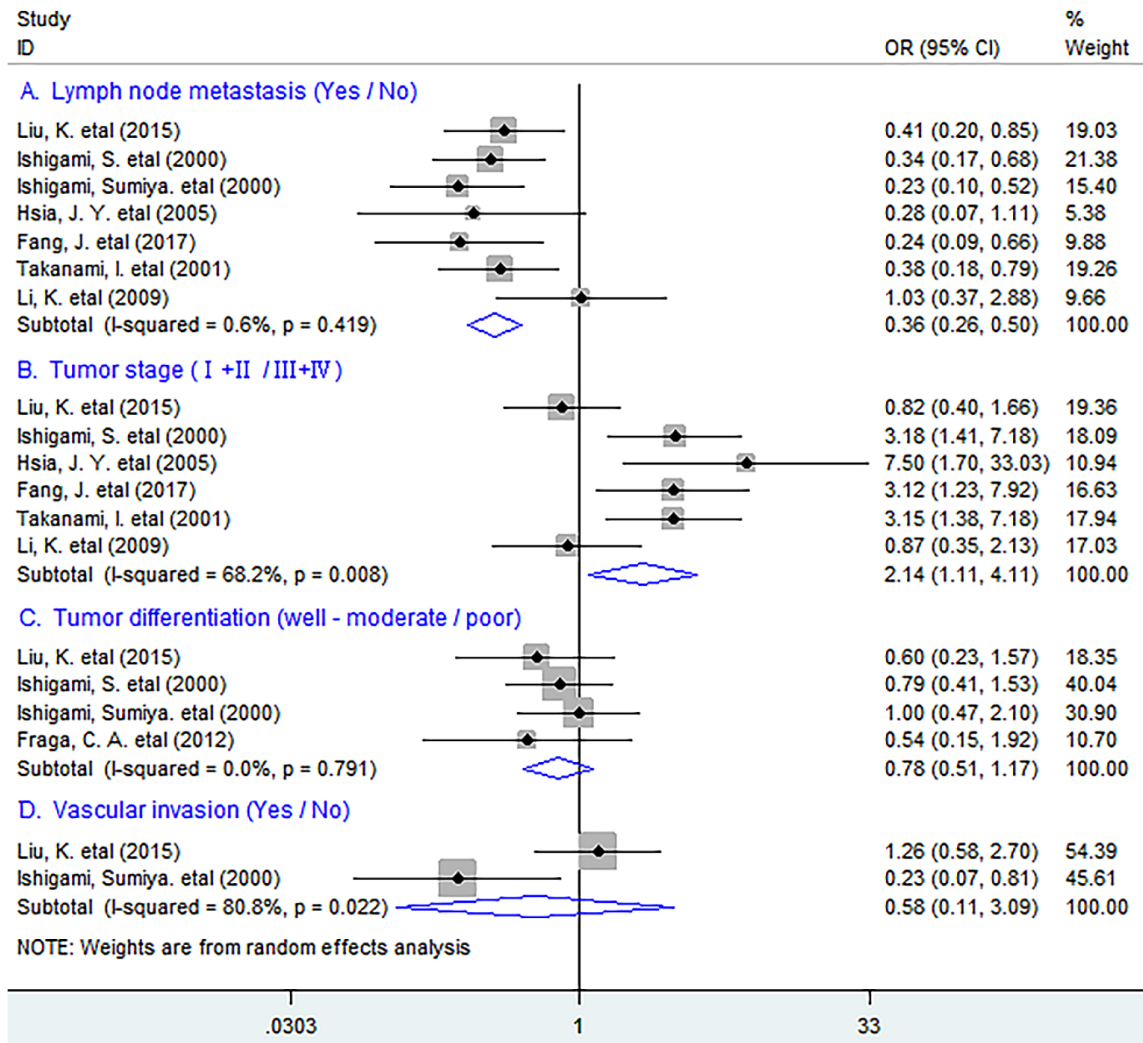

Supplementary Figure 3: Forest plots indicating ORs of the association between CD57<sup>+</sup> lymphocyte infiltration and clinicopathological features of solid tumor.

**Supplementary Table 1: Characteristics of the included studies for OR analysis of clinicopathological features**

| Study                         | Year | Tumor type                 | No. of Patients | CD57+ lymphocytes: High/Low | Lymph node metastasis (Yes / No) | Tumor stage | I + II / III + IV        | Vascular invasion (Yes / No) | Tumor Differentiation (Well-moderate/poor) |
|-------------------------------|------|----------------------------|-----------------|-----------------------------|----------------------------------|-------------|--------------------------|------------------------------|--------------------------------------------|
| Liu, K. et al. [13]           | 2015 | Gastric cancer             | 166             | 83/83                       | H: (54/29);<br>L: (64/19)        | I-IV        | H: (39/44)<br>L: (25/58) | H: (18/65);<br>L: (15/68)    | H: (10/30); L:<br>(14/25)                  |
| Ishigami, S. et al. [14]      | 2000 | Gastric cancer             | 169             | 53/116                      | H: (16/37);<br>L: (65/51)        | NR          | NR                       | NR                           | H: (29/24); L:<br>(70/46)                  |
| Ishigami, Sumiya. et al. [15] | 2000 | Gastric cancer             | 146             | 39/107                      | H: (10/29);<br>L: (64/43)        | I-IV        | H: (29/10)<br>L: (51/56) | H: (3/36);<br>L: (28/78)     | H: (23/16); L:<br>(62/43)                  |
| Hsia, J. Y. et al. [17]       | 2005 | Esophageal carcinoma       | 38              | 14/24                       | H: (5/9);<br>L: (16/8)           | I-IV        | H: (10/4)<br>L: (6/18)   | NR                           | NR                                         |
| Fang, J. et al. [18]          | 2017 | Head and neck carcinoma    | 78              | 34/44                       | H: (7/27);<br>L: (23/21)         | I-IV        | H: (21/13)<br>L: (15/29) | NR                           | NR                                         |
| Fraga, C. A. et al. [20]      | 2012 | Head and neck carcinoma    | 70              | 35/35                       | NR                               | NR          | NR                       | NR                           | H: (7/10); L:<br>(13/10)                   |
| Takanami, I. et al. [24]      | 2001 | Non-small cell lung cancer | 150             | 53/97                       | H: (14/39);<br>L: (47/50)        | I-III A     | H: (44/9)<br>L: (59/38)  | NR                           | NR                                         |
| Li, K. et al. [26]            | 2009 | Ovarian Cancer             | 82              | 33/49                       | H: (8/24);<br>L: (12/37)         | I-IV        | H: (13/20)<br>L: (21/28) | NR                           | NR                                         |

H: high; L: low; NR: not reported.
